# Supplementary material for: Acoustically Driven Cell-Based Microrobots for Targeted Tumor Therapy
Source: MDPI journal article supplement (doi:10.3390/pharmaceutics14102143), 2022-10-09
Supplement: s1 [file s1]

Supplementary Materials

# Acoustically Driven Cell-Based Microrobots for Targeted Tumor Therapy

Hiep Xuan Cao <sup>1,2</sup>, Van Du Nguyen <sup>1,2</sup>, Daewon Jung <sup>2</sup>, Eunpyo Choi <sup>1,2</sup>, Chang-Sei Kim <sup>1,\*</sup>, Jong-Oh Park <sup>2,\*</sup>,  
Byungjeon Kang <sup>2,3,4,\*</sup> +

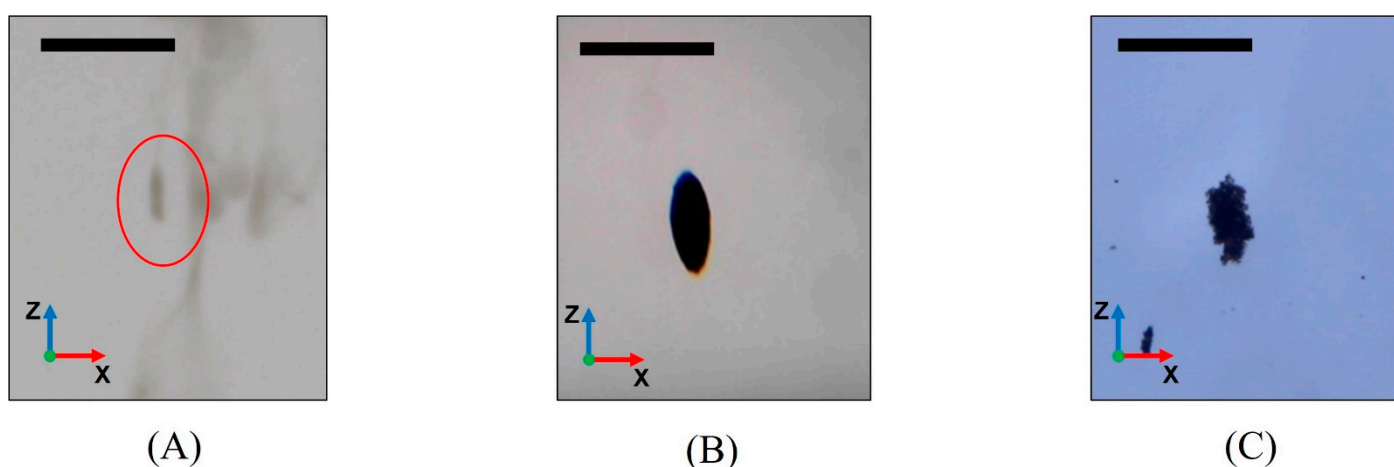

**Figure S1.** Demonstration of trap and manipulation: (A) macrophage; (B) SPIONs ; (C) Macbots.

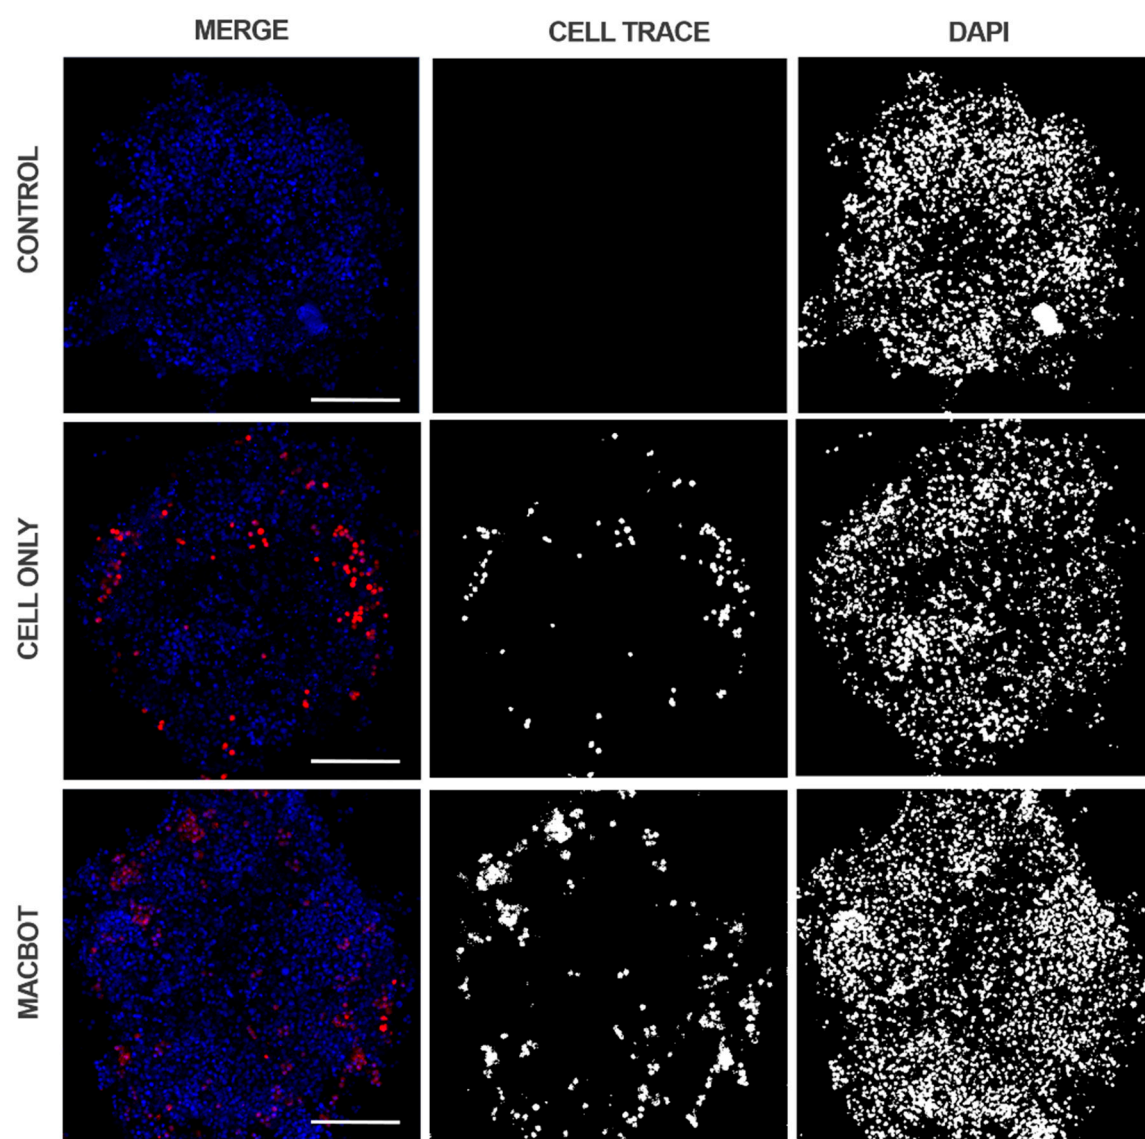

**Figure S2.** CELL TRACE and DAPI channels from the merged images were extracted for quantitative analysis of penetration.

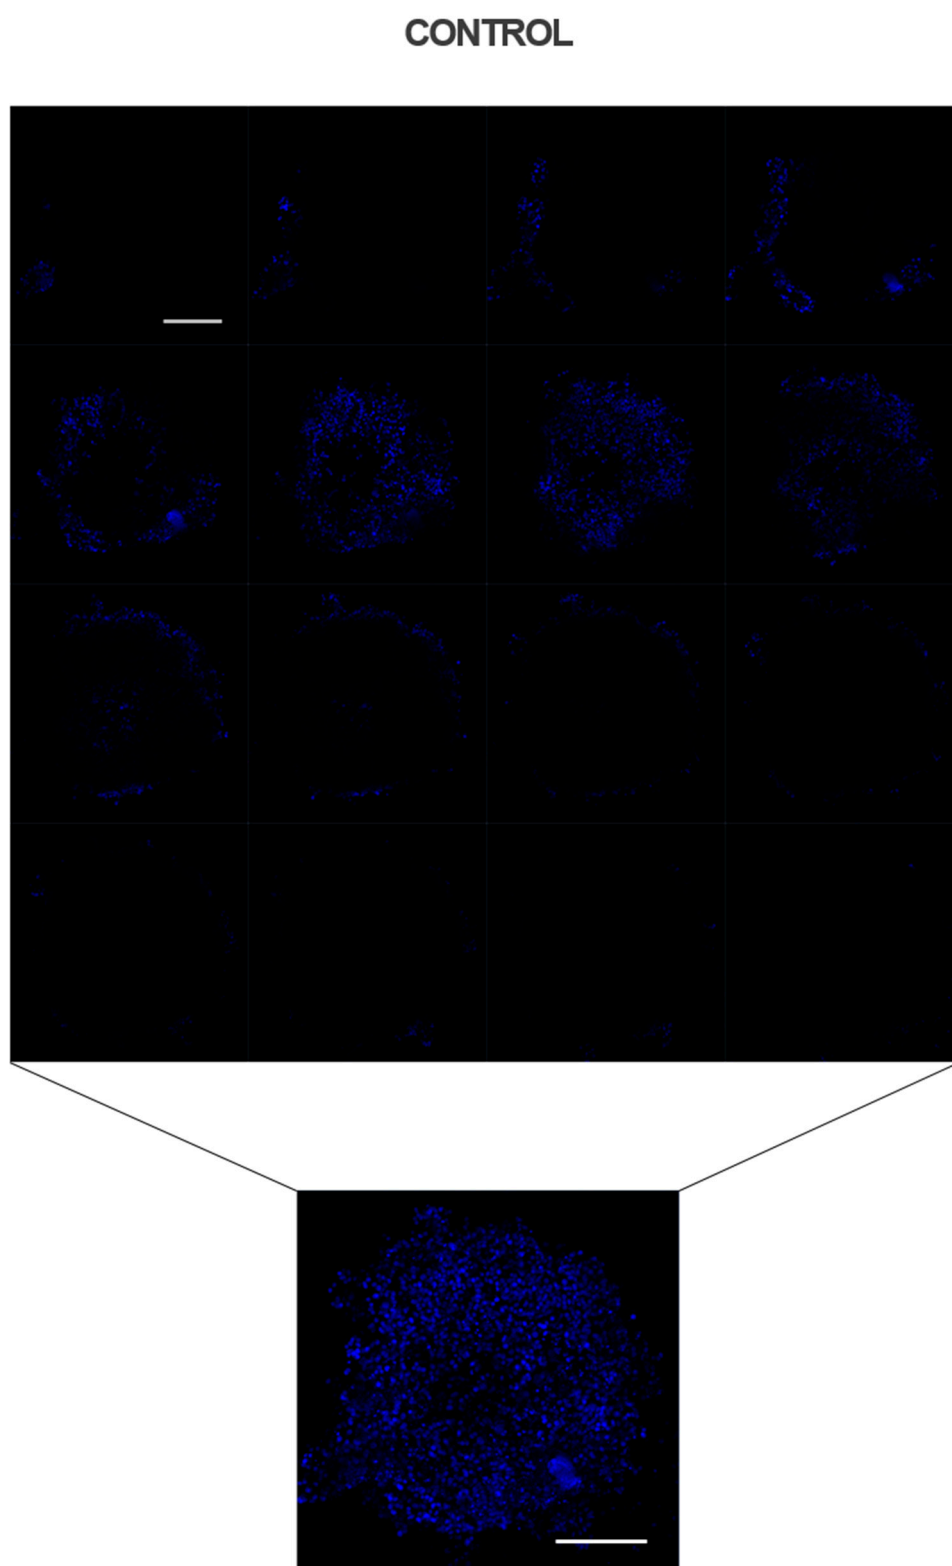

**Figure S3.** Penetration into A549 tumor spheroids imaged at different depths of the spheroids of Control sample. Scale bars 200  $\mu\text{m}$ .

## CELL ONLY

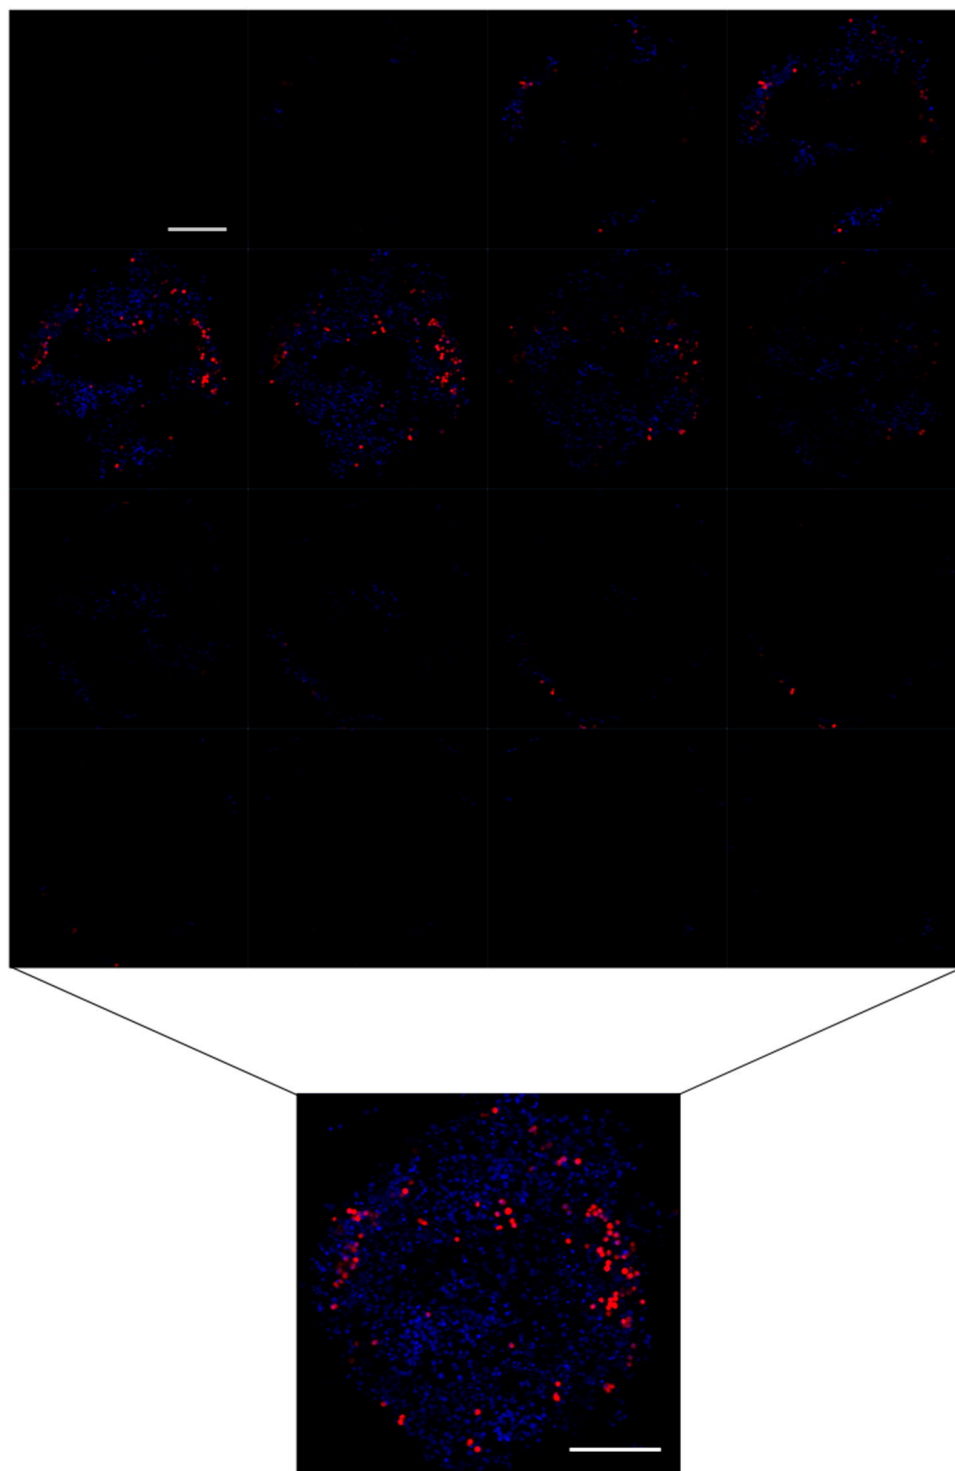

**Figure S4.** Penetration into A549 tumor spheroids imaged at different depths of the spheroids of Cell only sample. Scale bars 200  $\mu\text{m}$ .

## MACBOT

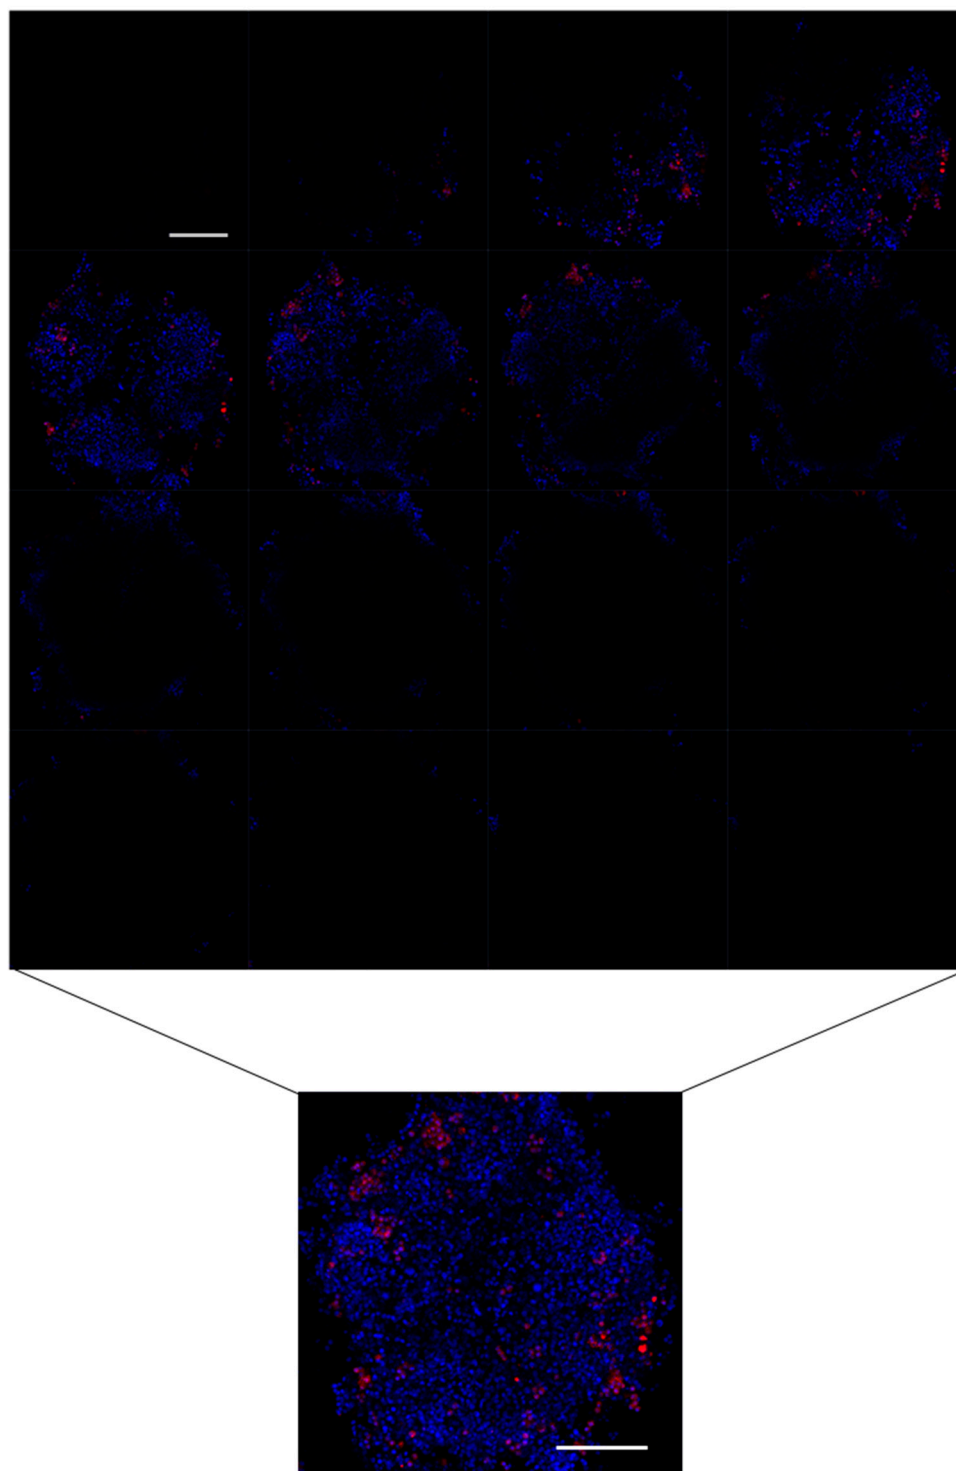

**Figure S5.** Penetration into A549 tumor spheroids imaged at different depths of the spheroids of Macbot sample. Scale bars 200  $\mu\text{m}$ .
